# Supplementary material
Source: MDPI journal article supplement (https://www.mdpi.com/2227-9717/7/6/366)
Supplement: s1 [file s1]

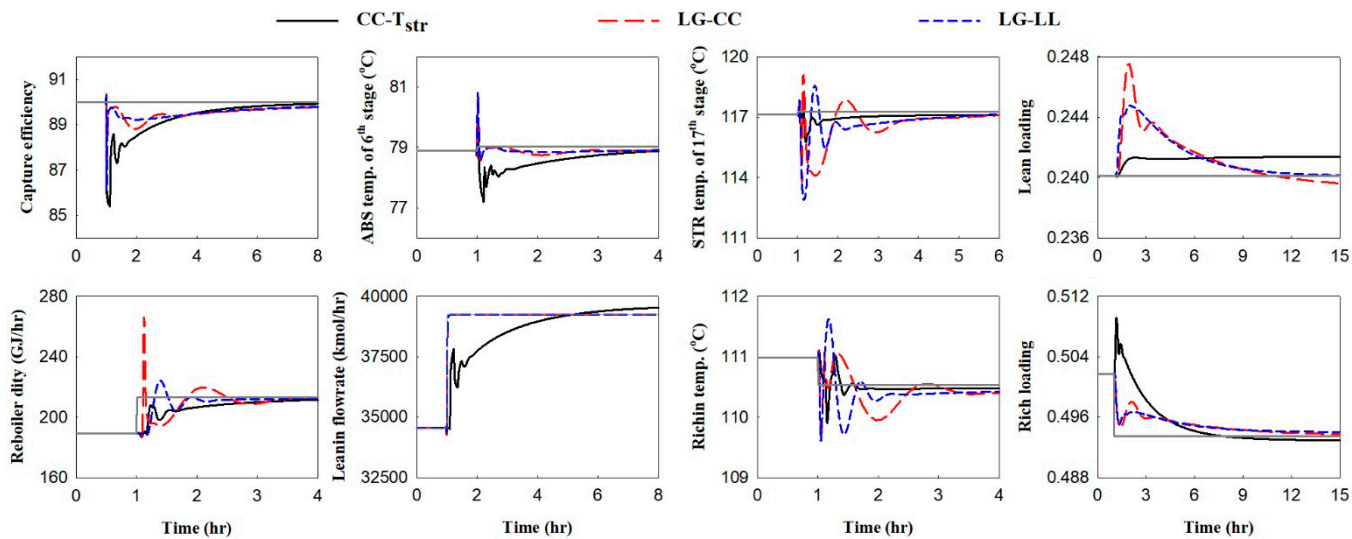

(a)

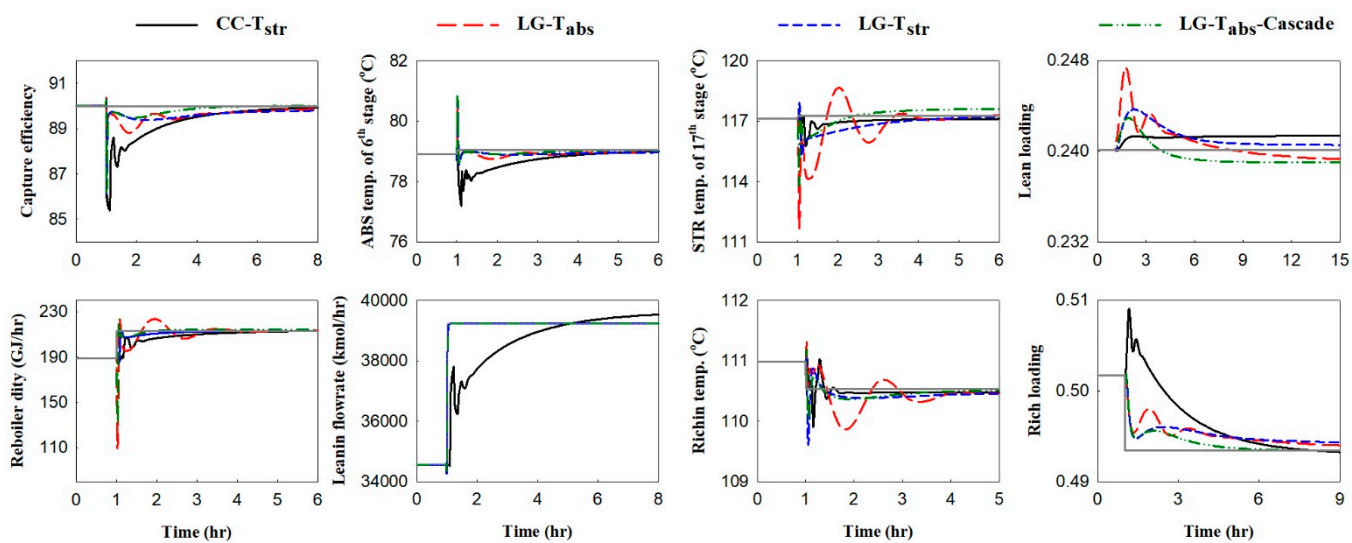

(b)

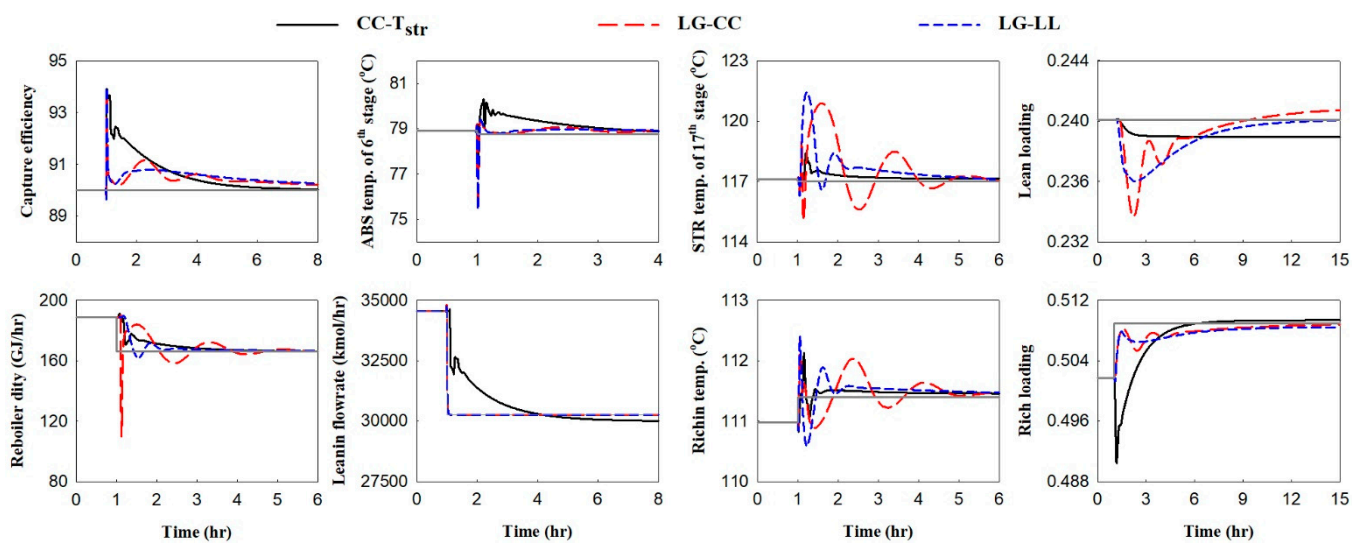

(c)

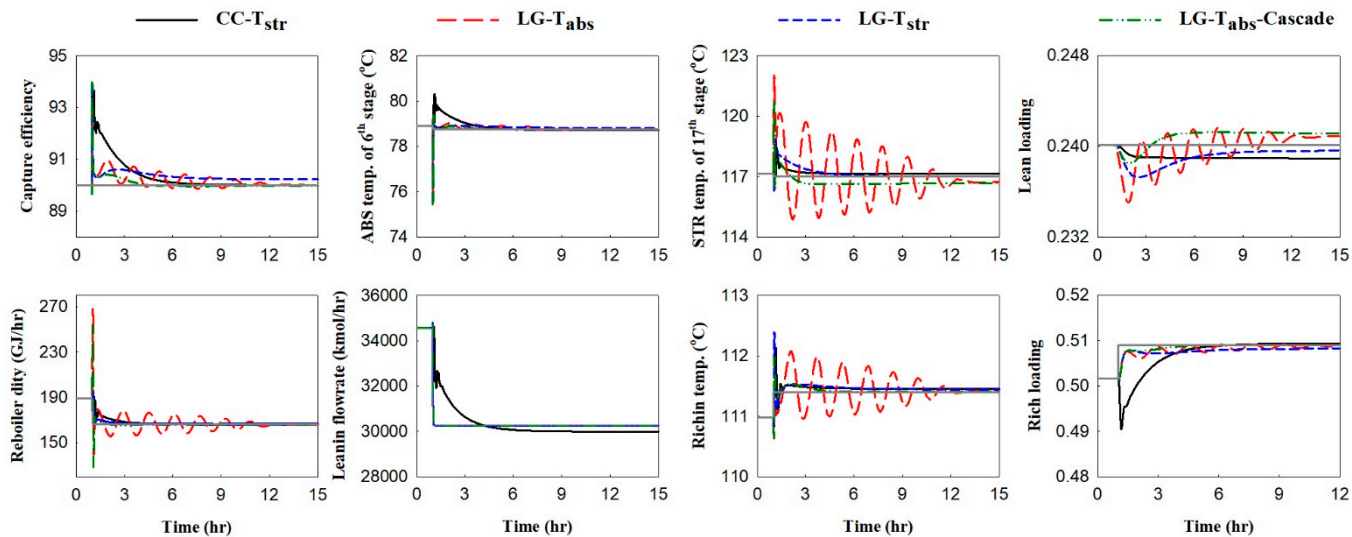

(d)

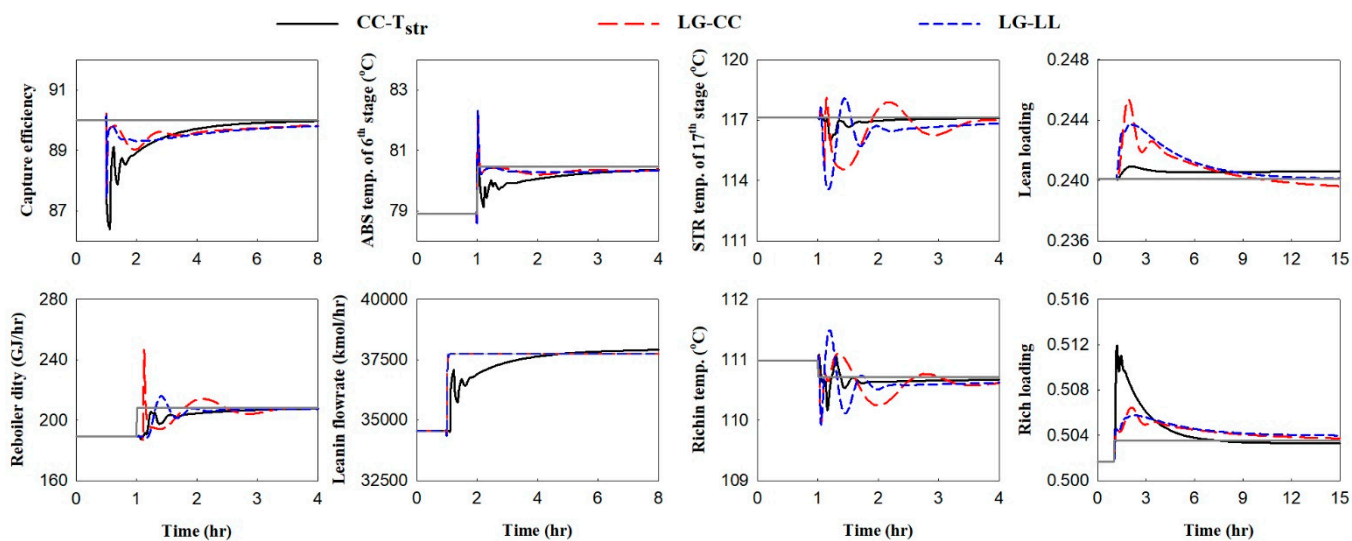

(e)

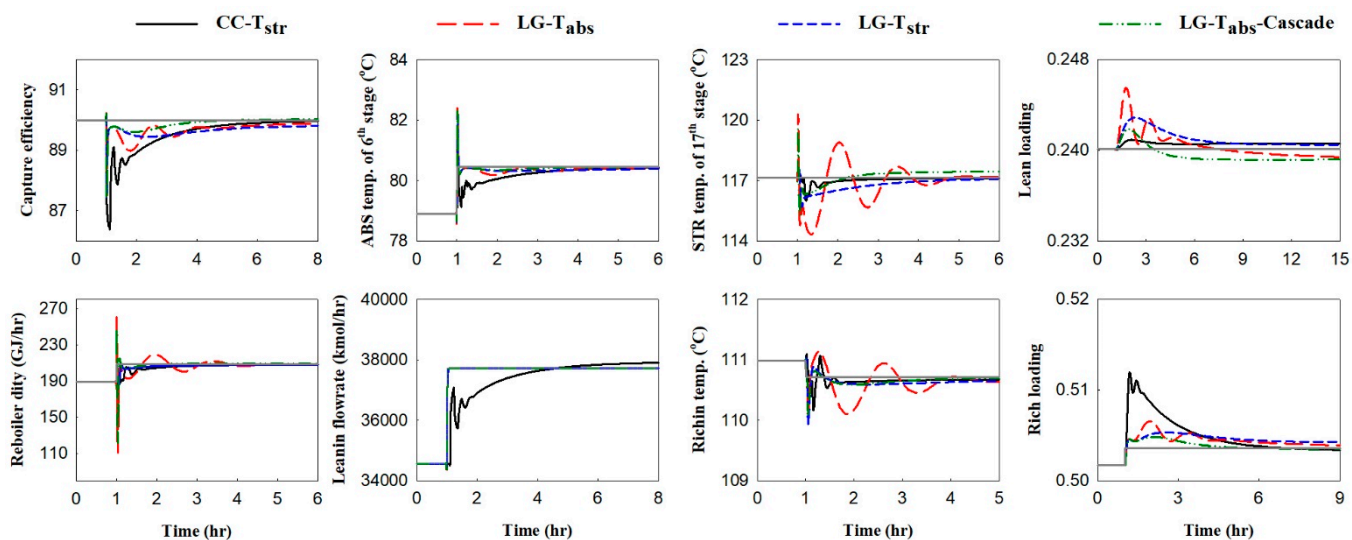

(f)

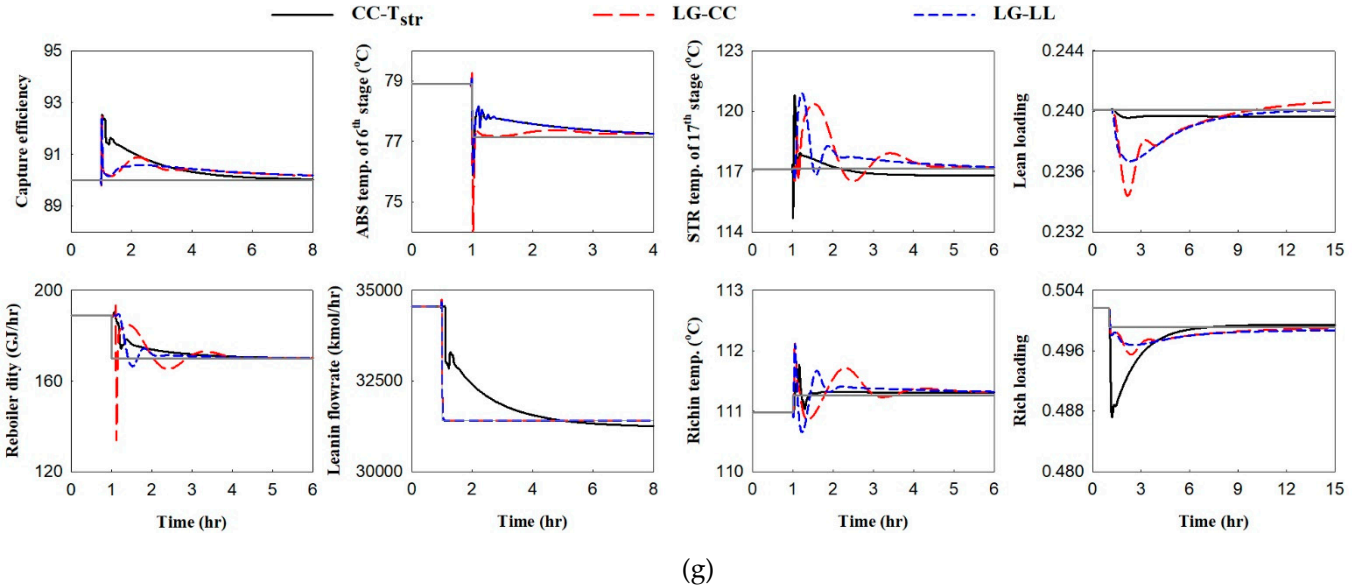

(g)

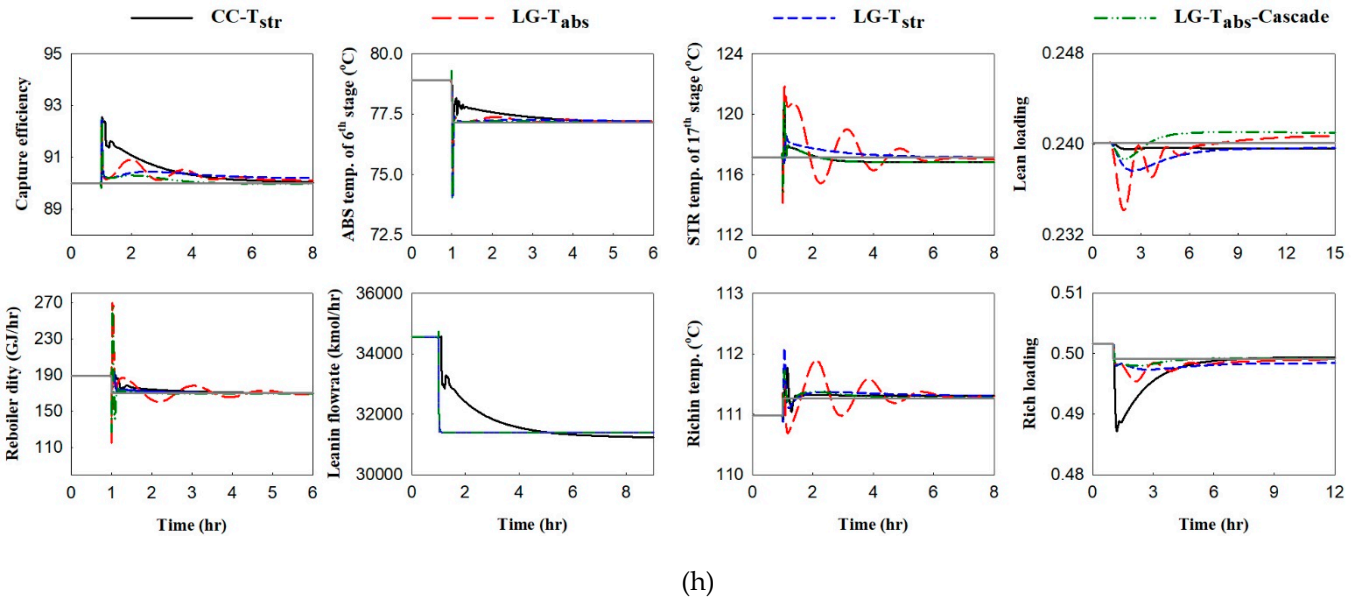

(h)

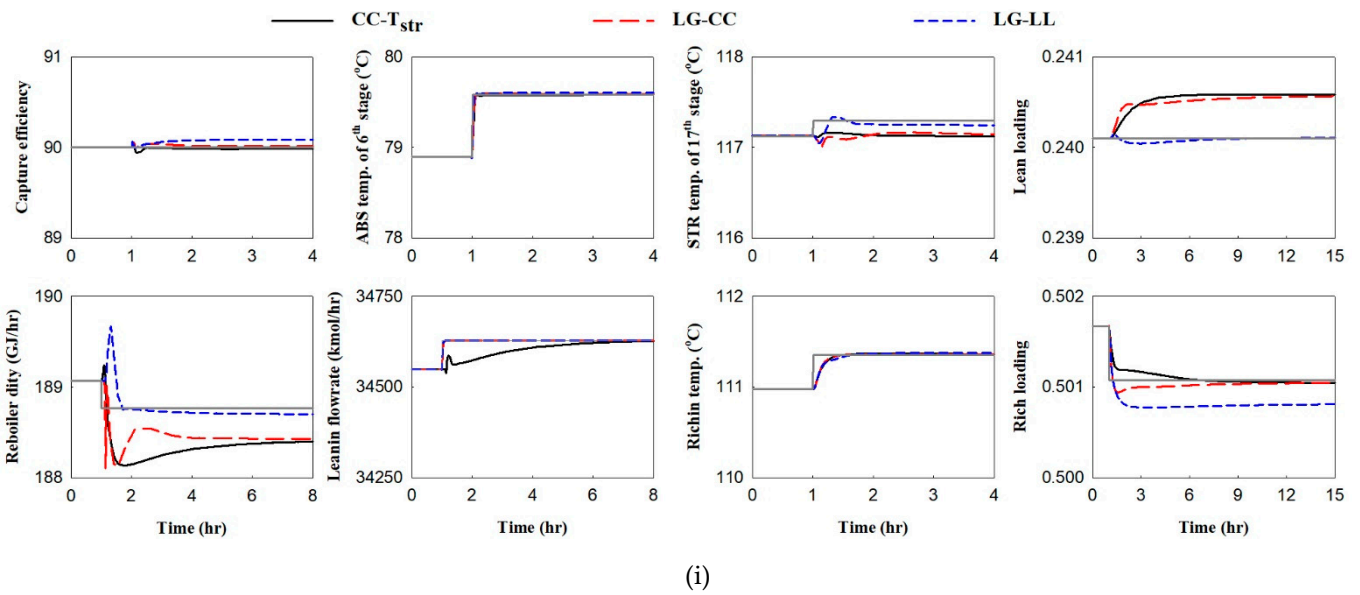

(i)

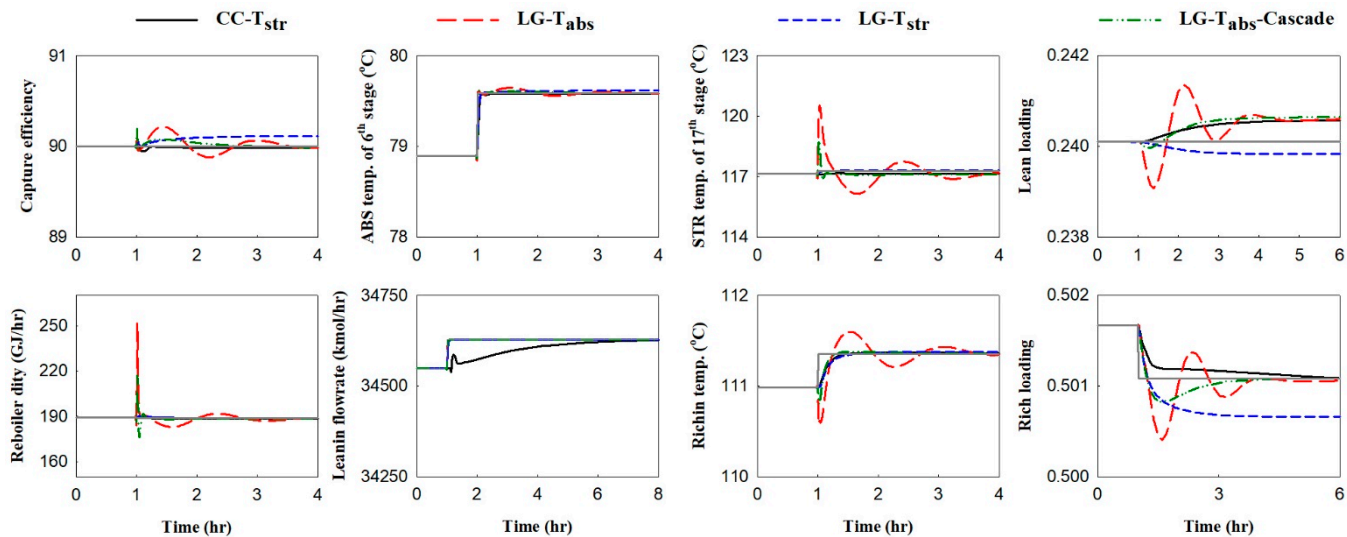

(j)

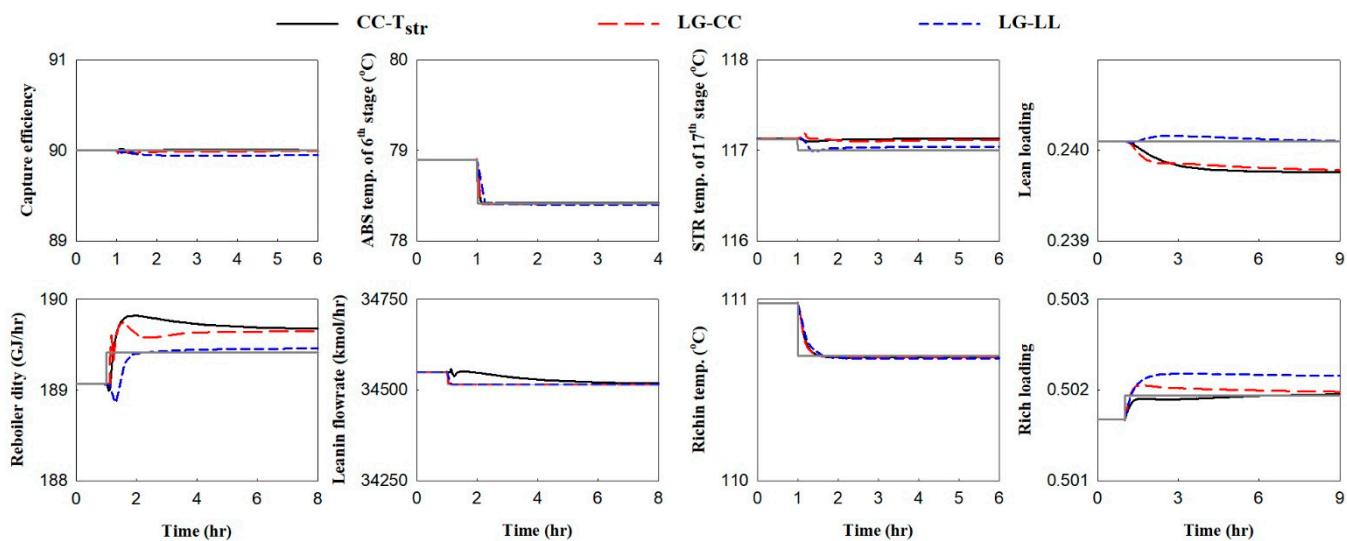

(k)

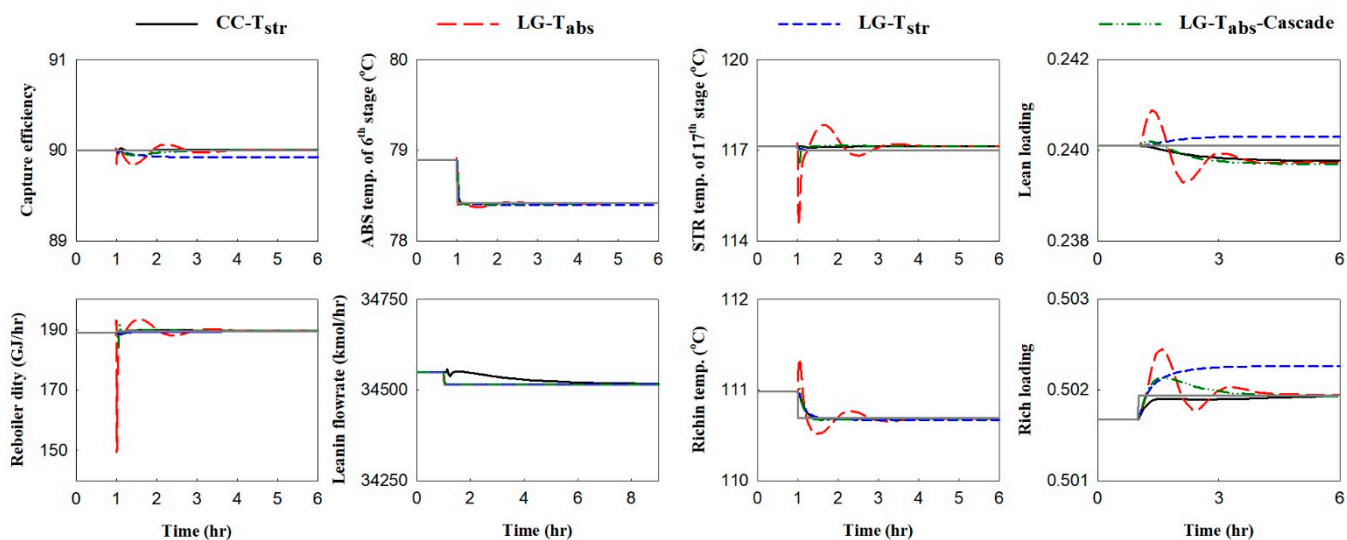

(l)

**Figure S1.** Dynamic responses for disturbance changes of flue gas conditions. (a) 10% increase of flue gas flowrate –

concentration-control related schemes; **(b)** 10% increase of flue gas flowrate – temperature-control related schemes; **(c)** 10% decrease of flue gas flowrate – concentration-control related schemes; **(d)** 10% decrease of flue gas flowrate – temperature-control related schemes; **(e)** 10% increase of flue gas concentration – concentration-control related schemes; **(f)** 10% increase of flue gas concentration – temperature-control related schemes; **(g)** 10% decrease of flue gas concentration – concentration-control related schemes; **(h)** 10% decrease of flue gas concentration – temperature-control related schemes; **(i)** 12.5% increase of flue gas temperature – concentration-control related schemes; **(j)** 12.5% increase of flue gas temperature – temperature-control related schemes; **(k)** 12.5% decrease of flue gas temperature – concentration-control related schemes; **(l)** 12.5% decrease of flue gas temperature – temperature-control related schemes



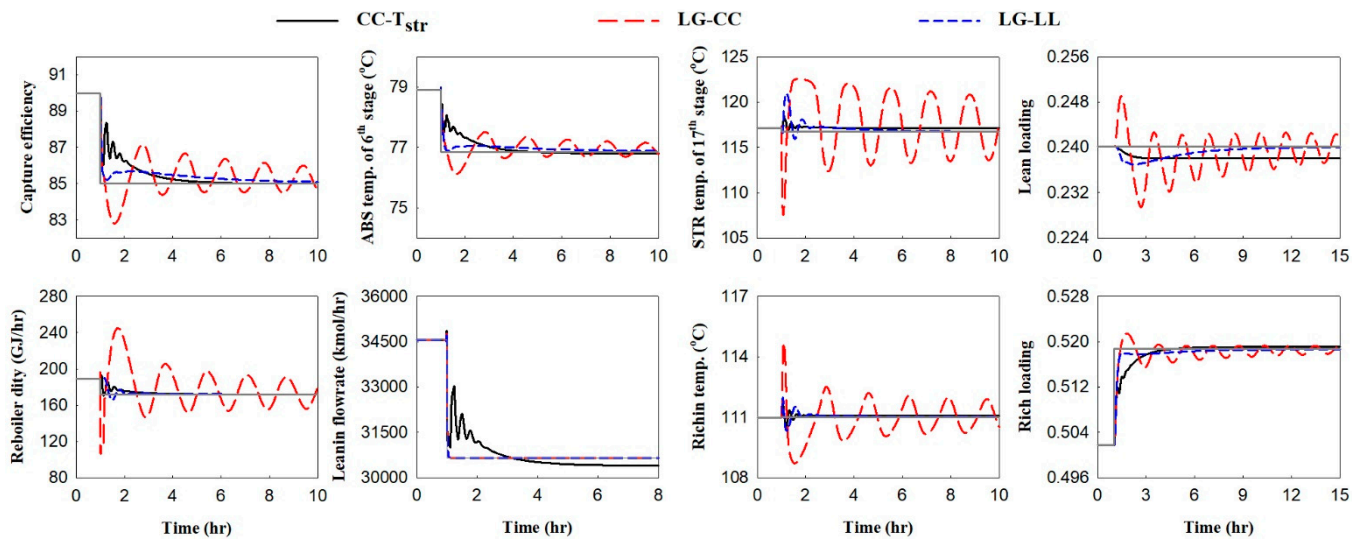

(a)

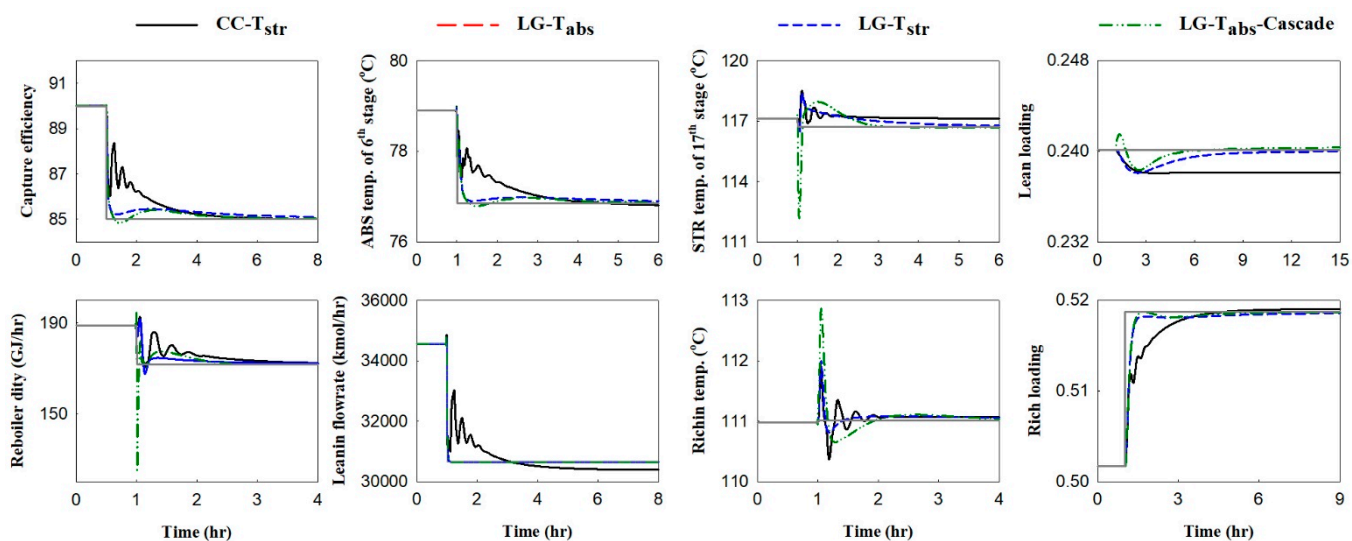

(b)

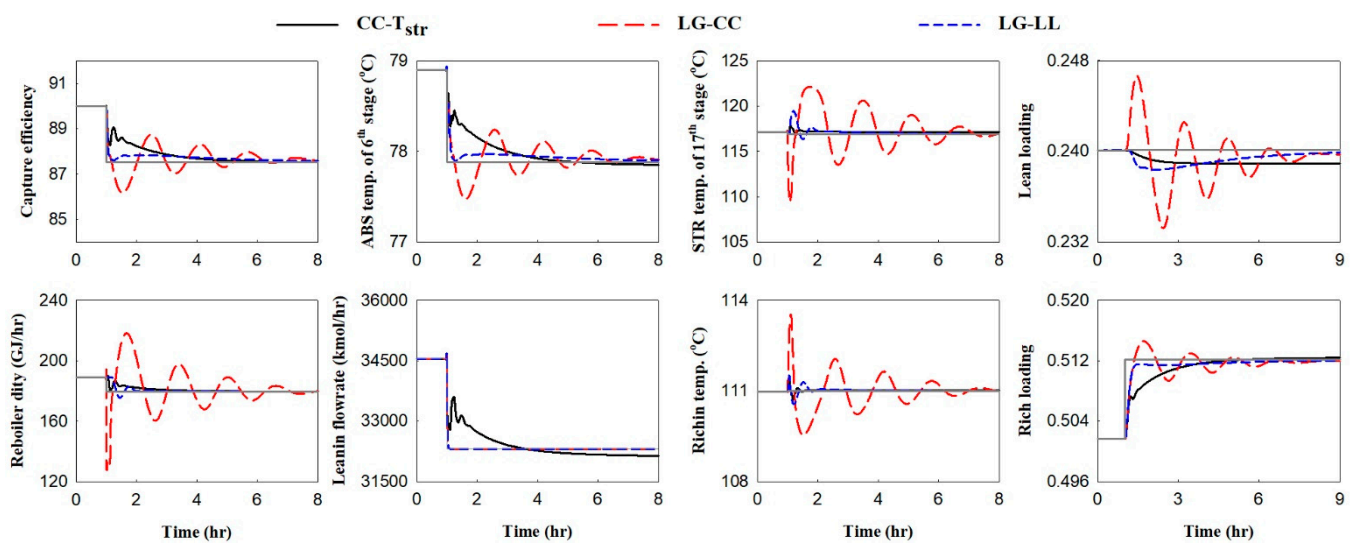

(c)

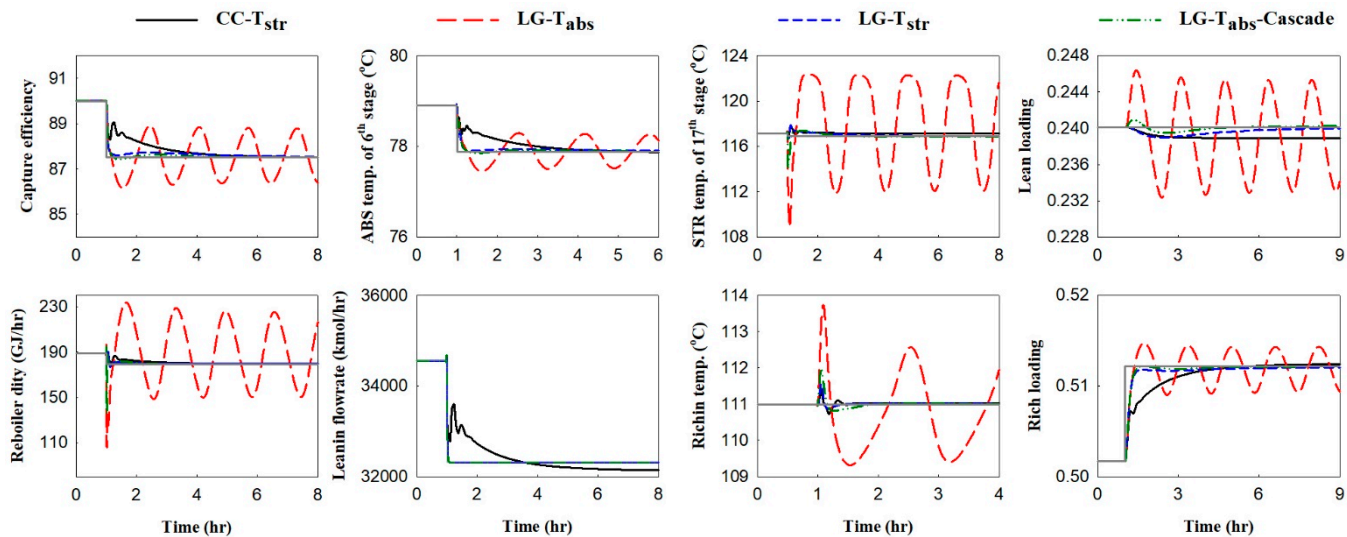

(d)

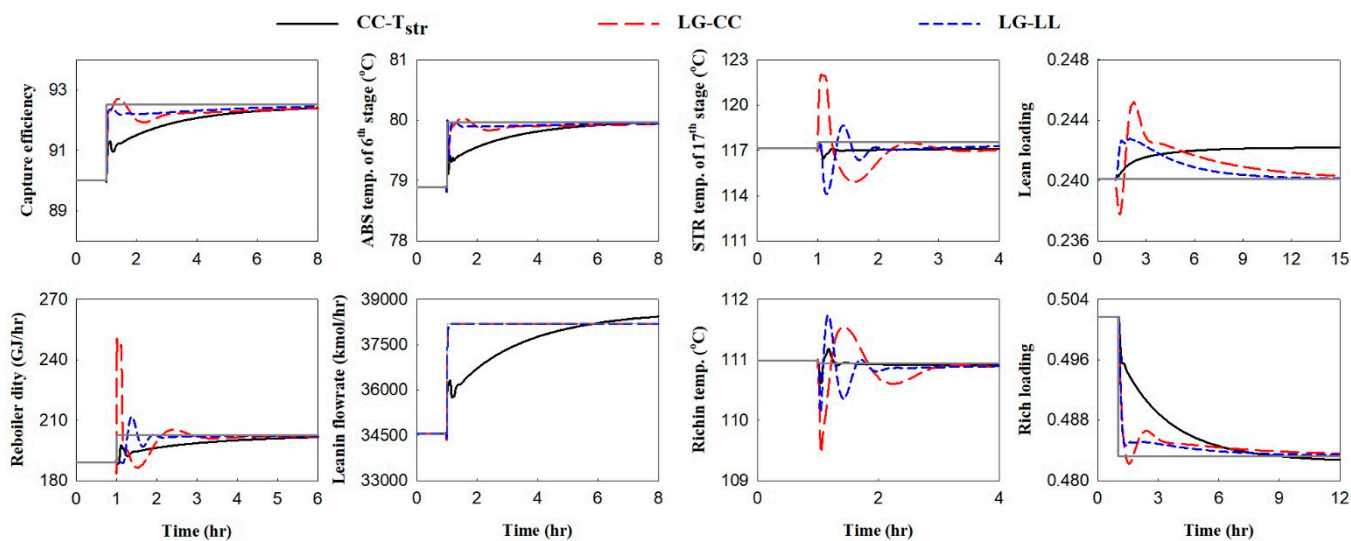

(e)

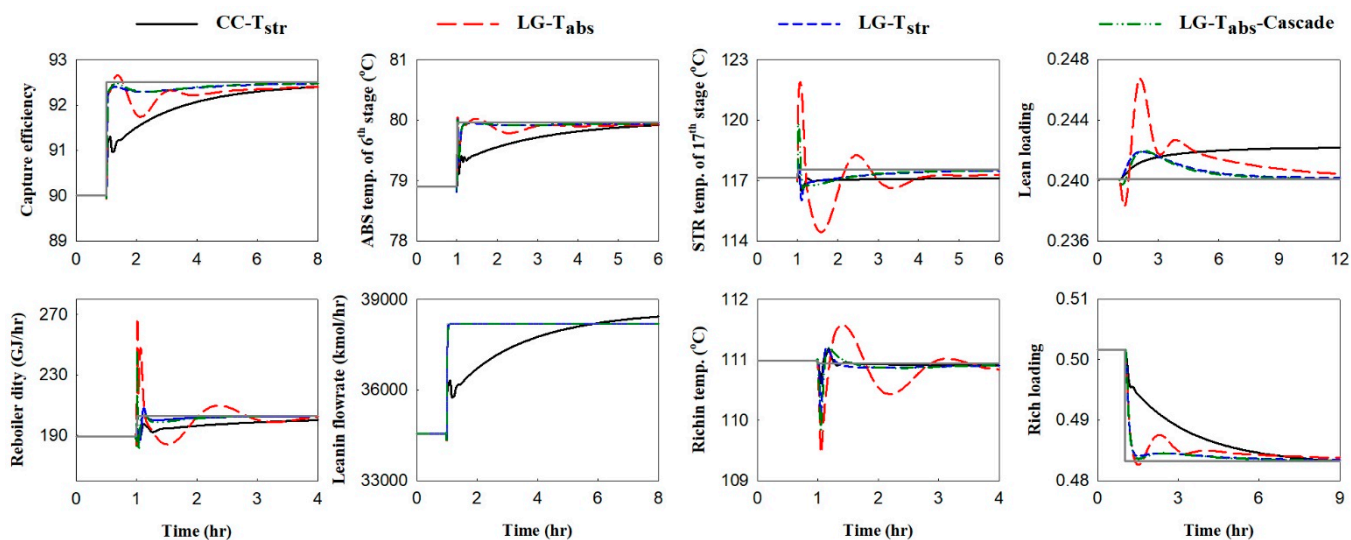

(f)

(1) 90% to 95%

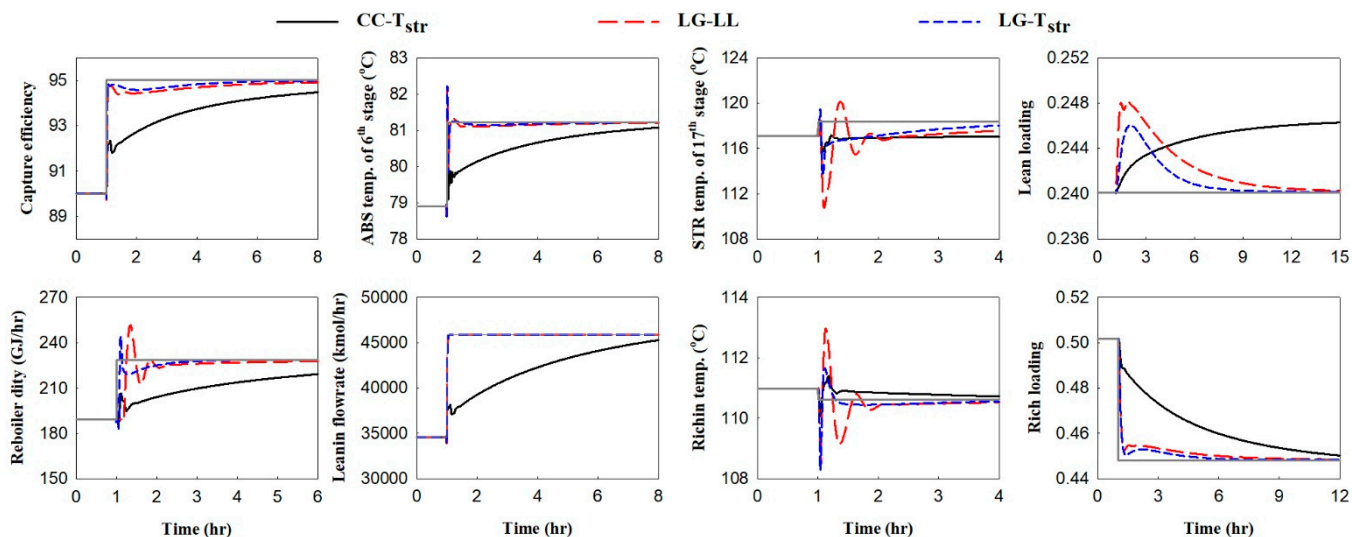

(g)

**Figure S2.** Dynamic responses for set-point changes of CO<sub>2</sub> capture efficiency. (a) 90% to 85% - concentration-control related schemes; (b) 90% to 85% - temperature-control related schemes; (c) 90% to 87.5% - concentration-control related schemes; (d) 90% to 87.5% - temperature-control related schemes; (e) 90% to 92.5% - concentration-control related schemes; (f) 90% to 92.5% - temperature-control related schemes; (g) 90% to 95% - all schemes.
